# Supplementary material
Source: Elsevier journal article supplement (http://www.aiub.edu/Files/Uploads/mmc2.pdf)
Supplement: mmc2 [file mmc2.pdf]

**AMERICAN INTERNATIONAL UNIVERSITY - BANGLADESH**  
**ADMISSION VIVA RESULT OF**  
**SPRING 20-21 (SLOT-3) [Batch-02] APPLICANTS**

| <b>Sl.No.</b> | <b>Roll</b> | <b>Dept.</b> | <b>REMARKS</b> |
|---------------|-------------|--------------|----------------|
| 1             | 21-30240-1  | MMC          |                |
| 2             | 21-30247-1  | MMC          |                |
